# Supplementary material
Source: Springer Nature journal article supplement (https://www.springermedizin.de/resource/supplementary/12885_2010_2645_MOESM2_ESM.pdf/9461664)
Supplement: MOESM2 [file 9461664]

### Endometrial Cancer (age at diag. < 50)

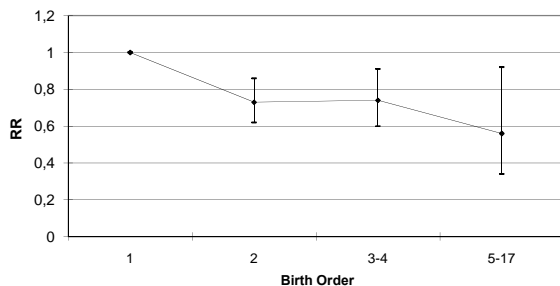

| family size | Ref  | RR (95% CI)             | RR (95% CI)             | RR (95% CI)             |
|-------------|------|-------------------------|-------------------------|-------------------------|
| any         | 1.00 | <b>0.73</b> (0.62-0.86) | <b>0.74</b> (0.60-0.91) | <b>0.56</b> (0.34-0.92) |

### Endometrial Cancer (age at diag. ≥ 50)

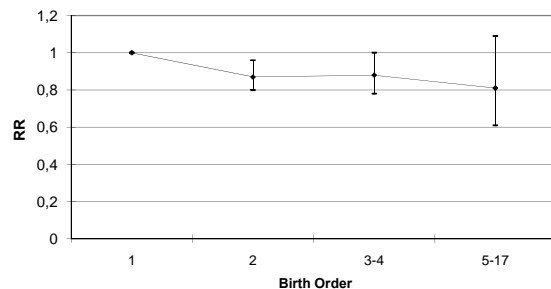

| family size | Ref  | RR (95% CI)             | RR (95% CI)      | RR (95% CI)      |
|-------------|------|-------------------------|------------------|------------------|
| any         | 1.00 | <b>0.87</b> (0.80-0.96) | 0.88 (0.78-1.00) | 0.81 (0.61-1.09) |

### Endometrial Cancer (age at diag. < 50)

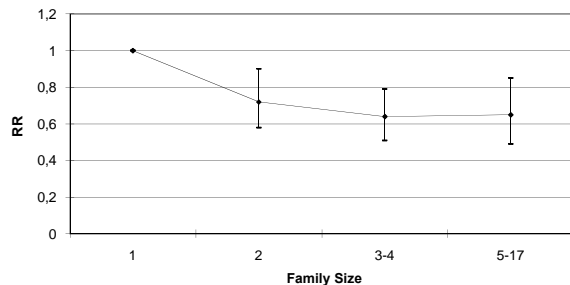

| birth order | Ref  | RR (95% CI)             | RR (95% CI)             | RR (95% CI)             |
|-------------|------|-------------------------|-------------------------|-------------------------|
| any         | 1.00 | <b>0.72</b> (0.58-0.90) | <b>0.64</b> (0.51-0.79) | <b>0.65</b> (0.49-0.85) |

### Endometrial Cancer (age at diag. ≥ 50)

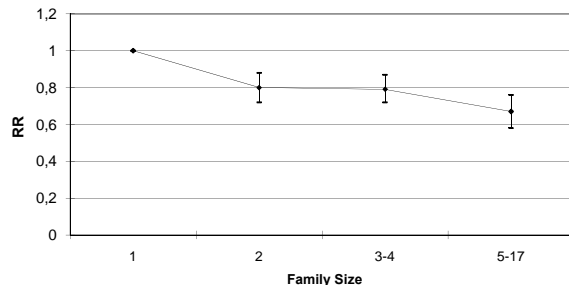

| birth order | Ref  | RR (95% CI)             | RR (95% CI)             | RR (95% CI)             |
|-------------|------|-------------------------|-------------------------|-------------------------|
| any         | 1.00 | <b>0.80</b> (0.72-0.88) | <b>0.79</b> (0.72-0.87) | <b>0.67</b> (0.58-0.76) |
